# Supplementary material for: Gamma Irradiation Triggers Immune Escape in Glioma-Propagating Cells
Source: Cancers (Basel). 2022 May 31;14(11):2728. doi: 10.3390/cancers14112728 (PMC9179833; doi:10.3390/cancers14112728)
Supplement: Supplementary file 1 [file cancers-14-02728-s001.zip › Hoppmann et al Immune escape_Table S1.xlsx]

## Sheet: DRM analysis GPC vs. rsGPC
Accession No.	Description	Experiment 1	Experiment 2	Mean both experiments
		log2 Mean (rsGPCs/GpCs)	log2 Mean (rsGPCs/GPCs)	log2 Mean (rsGPCs/GPCs)
1433B_HUMAN	14+3+3+protein+beta+alpha+OS+Homo+sapiens+GN+YWHAB+PE+1+SV+3	-0.84563	-0.514411	-0.68002
1433E_HUMAN	14+3+3+protein+epsilon+OS+Homo+sapiens+GN+YWHAE+PE+1+SV+1	0.115882	1.16848	0.642183
1433G_HUMAN	14+3+3+protein+gamma+OS+Homo+sapiens+GN+YWHAG+PE+1+SV+2	0.235658	0.444668	0.340163
1433Z_HUMAN	14+3+3+protein+zeta+delta+OS+Homo+sapiens+GN+YWHAZ+PE+1+SV+1	0.104133	0.373401	0.238767
1A02_HUMAN	HLA+class+I+histocompatibility+antigen+A+2+alpha+chain+OS+Homo+sapiens+GN+HLA+A+PE+1+SV+1	-0.0579398	0.480874	0.211467
1B08_HUMAN	HLA+class+I+histocompatibility+antigen+B+8+alpha+chain+OS+Homo+sapiens+GN+HLA+B+PE+1+SV+1	-1.01499	-2.30617	-1.66058
1C07_HUMAN	HLA+class+I+histocompatibility+antigen+Cw+7+alpha+chain+OS+Homo+sapiens+GN+HLA+C+PE+1+SV+3	-0.0615568	-0.605117	-0.333337
4F2_HUMAN	4F2+cell+surface+antigen+heavy+chain+OS+Homo+sapiens+GN+SLC3A2+PE+1+SV+3	0.125167	-0.0971526	0.0140074
A4_HUMAN	Amyloid+beta+A4+protein+OS+Homo+sapiens+GN+APP+PE+1+SV+3	-1.20094	-0.368813	-0.784876
AAAT_HUMAN	Neutral+amino+acid+transporter+B+0+OS+Homo+sapiens+GN+SLC1A5+PE+1+SV+2	0.223861	-0.366685	-0.071412
ABCB6_HUMAN	ATP+binding+cassette+sub+family+B+member+6+mitochondrial+OS+Homo+sapiens+GN+ABCB6+PE+1+SV+1	-0.0573166	0.159366	0.0510248
ABCD3_HUMAN	ATP+binding+cassette+sub+family+D+member+3+OS+Homo+sapiens+GN+ABCD3+PE+1+SV+1	-0.851196	0.478932	-0.186132
ABCE1_HUMAN	ATP+binding+cassette+sub+family+E+member+1+OS+Homo+sapiens+GN+ABCE1+PE+1+SV+1	-0.37901	0.299515	-0.0397478
ACATN_HUMAN	Acetyl+coenzyme+A+transporter+1+OS+Homo+sapiens+GN+SLC33A1+PE+1+SV+1	-0.432578	0.238466	-0.0970561
ACOD_HUMAN	Acyl+CoA+desaturase+OS+Homo+sapiens+GN+SCD+PE+1+SV+2	-0.216863	-1.23291	-0.724887
ADAM9_HUMAN	Disintegrin+and+metalloproteinase+domain+containing+protein+9+OS+Homo+sapiens+GN+ADAM9+PE+1+SV+1	0.0615256	0.363635	0.21258
ADT1_HUMAN	ADP+ATP+translocase+1+OS+Homo+sapiens+GN+SLC25A4+PE+1+SV+4	-0.380849	-0.14758	-0.264215
ADT2_HUMAN	ADP+ATP+translocase+2+OS+Homo+sapiens+GN+SLC25A5+PE+1+SV+7	0.258761	0.551997	0.405379
ADT3_HUMAN	ADP+ATP+translocase+3+OS+Homo+sapiens+GN+SLC25A6+PE+1+SV+4	0.342282	0.274039	0.30816
ADT4_HUMAN	ADP+ATP+translocase+4+OS+Homo+sapiens+GN+SLC25A31+PE+1+SV+1	-0.171667	-0.0775514	-0.124609
AFG32_HUMAN	AFG3+like+protein+2+OS+Homo+sapiens+GN+AFG3L2+PE+1+SV+2	-0.0753315	0.294256	0.109462
AGK_HUMAN	Acylglycerol+kinase+mitochondrial+OS+Homo+sapiens+GN+AGK+PE+1+SV+2	-0.561831	-0.652629	-0.60723
AGO61_HUMAN	Uncharacterized+glycosyltransferase+AGO61+OS+Homo+sapiens+GN+AGO61+PE+2+SV+1	-0.74577	-0.453884	-0.599827
ALBU_BOVIN	Serum+albumin+precursor+Allergen+Bos+d+6+BSA	-0.276696	0.465676	0.0944902
ALG12_HUMAN	Dol+P+Man+Man+7+GlcNAc+2+PP+Dol+alpha+1+6+mannosyltransferase+OS+Homo+sapiens+GN+ALG12+PE+1+SV+1	-0.583359	-0.320743	-0.452051
ALG9_HUMAN	Alpha+1+2+mannosyltransferase+ALG9+OS+Homo+sapiens+GN+ALG9+PE+1+SV+2	-0.531491	0.0945775	-0.218457
ANO10_HUMAN	Anoctamin+10+OS+Homo+sapiens+GN+ANO10+PE+1+SV+2	-0.537843	-0.456753	-0.497298
ANXA2_HUMAN	Annexin+A2+OS+Homo+sapiens+GN+ANXA2+PE+1+SV+2	0.341685	0.286194	0.31394
AP2B1_HUMAN	AP+2+complex+subunit+beta+OS+Homo+sapiens+GN+AP2B1+PE+1+SV+1	0.341543	1.01193	0.676734
APLP2_HUMAN	Amyloid+like+protein+2+OS+Homo+sapiens+GN+APLP2+PE+1+SV+2	-0.862836	-0.404337	-0.633587
ARFRP_HUMAN	ADP+ribosylation+factor+related+protein+1+OS+Homo+sapiens+GN+ARFRP1+PE+1+SV+1	-0.640778	-0.114352	-0.377565
ASPH_HUMAN	Aspartyl+asparaginyl+beta+hydroxylase+OS+Homo+sapiens+GN+ASPH+PE+1+SV+3	-0.625136	-0.0700576	-0.347597
AT12A_HUMAN	Potassium+transporting+ATPase+alpha+chain+2+OS+Homo+sapiens+GN+ATP12A+PE+2+SV+3	-2.15736	-0.806001	-1.48168
AT131_HUMAN	Probable+cation+transporting+ATPase+13A1+OS+Homo+sapiens+GN+ATP13A1+PE+1+SV+2	-0.429778	0.0744013	-0.177688
AT1A1_HUMAN	Sodium+potassium+transporting+ATPase+subunit+alpha+1+OS+Homo+sapiens+GN+ATP1A1+PE+1+SV+1	0.23099	-0.544463	-0.156736
AT1A2_HUMAN	Sodium+potassium+transporting+ATPase+subunit+alpha+2+OS+Homo+sapiens+GN+ATP1A2+PE+1+SV+1	0.0496144	-1.21878	-0.584582
AT1A3_HUMAN	Sodium+potassium+transporting+ATPase+subunit+alpha+3+OS+Homo+sapiens+GN+ATP1A3+PE+1+SV+3	-0.0645268	-0.6648	-0.364664
AT1A4_HUMAN	Sodium+potassium+transporting+ATPase+subunit+alpha+4+OS+Homo+sapiens+GN+ATP1A4+PE+1+SV+3	-0.546373	-0.457202	-0.501787
AT1B1_HUMAN	Sodium+potassium+transporting+ATPase+subunit+beta+1+OS+Homo+sapiens+GN+ATP1B1+PE+1+SV+1	0.113097	-0.316747	-0.101825
AT2A1_HUMAN	Sarcoplasmic+endoplasmic+reticulum+calcium+ATPase+1+OS+Homo+sapiens+GN+ATP2A1+PE+1+SV+1	-0.466717	-0.199905	-0.333311
AT2A2_HUMAN	Sarcoplasmic+endoplasmic+reticulum+calcium+ATPase+2+OS+Homo+sapiens+GN+ATP2A2+PE+1+SV+1	-0.57459	-0.435958	-0.505274
AT2A3_HUMAN	Sarcoplasmic+endoplasmic+reticulum+calcium+ATPase+3+OS+Homo+sapiens+GN+ATP2A3+PE+1+SV+2	-0.477052	-1.2312	-0.854126
AT2B1_HUMAN	Plasma+membrane+calcium+transporting+ATPase+1+OS+Homo+sapiens+GN+ATP2B1+PE+1+SV+3	-0.10213	0.150182	0.024026
AT2B3_HUMAN	Plasma+membrane+calcium+transporting+ATPase+3+OS+Homo+sapiens+GN+ATP2B3+PE+1+SV+3	-1.04208	0.372859	-0.33461
AT2B4_HUMAN	Plasma+membrane+calcium+transporting+ATPase+4+OS+Homo+sapiens+GN+ATP2B4+PE+1+SV+2	-0.129222	-0.775933	-0.452577
AT2C1_HUMAN	Calcium+transporting+ATPase+type+2C+member+1+OS+Homo+sapiens+GN+ATP2C1+PE+1+SV+3	-0.356124	-0.393677	-0.3749
ATAD1_HUMAN	ATPase+family+AAA+domain+containing+protein+1+OS+Homo+sapiens+GN+ATAD1+PE+1+SV+1	-0.449177	-1.0915	-0.770336
ATG9A_HUMAN	Autophagy+related+protein+9A+OS+Homo+sapiens+GN+ATG9A+PE+1+SV+3	-0.283038	-0.0578574	-0.170447
ATP4A_HUMAN	Potassium+transporting+ATPase+alpha+chain+1+OS+Homo+sapiens+GN+ATP4A+PE+2+SV+5	-0.263446	0.374365	0.0554597
ATP5H_HUMAN	ATP+synthase+subunit+d+mitochondrial+OS+Homo+sapiens+GN+ATP5H+PE+1+SV+3	-0.169953	-0.123972	-0.146962
ATP9A_HUMAN	Probable+phospholipid+transporting+ATPase+IIA+OS+Homo+sapiens+GN+ATP9A+PE+1+SV+3	0.0795504	0.502399	0.290975
ATPA_HUMAN	ATP+synthase+subunit+alpha+mitochondrial+OS+Homo+sapiens+GN+ATP5A1+PE+1+SV+1	0.0524444	-0.169402	-0.0584789
ATPB_HUMAN	ATP+synthase+subunit+beta+mitochondrial+OS+Homo+sapiens+GN+ATP5B+PE+1+SV+3	-0.101093	0.124079	0.0114932
ATPO_HUMAN	ATP+synthase+subunit+O+mitochondrial+OS+Homo+sapiens+GN+ATP5O+PE+1+SV+1	0.0108731	-0.0634163	-0.0262716
B2MG_HUMAN	Beta+2+microglobulin+OS+Homo+sapiens+GN+B2M+PE+1+SV+1	-0.437159	-0.832367	-0.634763
B3GA3_HUMAN	Galactosylgalactosylxylosylprotein+3+beta+glucuronosyltransferase+3+OS+Homo+sapiens+GN+B3GAT3+PE+1+S	-0.557221	-1.08887	-0.823047
BAF_HUMAN	Barrier+to+autointegration+factor+OS+Homo+sapiens+GN+BANF1+PE+1+SV+1	-1.2175	1.00524	-0.106129
BAP31_HUMAN	B+cell+receptor+associated+protein+31+OS+Homo+sapiens+GN+BCAP31+PE+1+SV+3	-0.0826532	0.0998835	0.00861518
BASI_HUMAN	Basigin+OS+Homo+sapiens+GN+BSG+PE+1+SV+2	0.0461528	-0.569169	-0.261508
BASP1_HUMAN	Brain+acid+soluble+protein+1+OS+Homo+sapiens+GN+BASP1+PE+1+SV+2	-0.609568	0.162204	-0.223682
C1QBP_HUMAN	Complement+component+1+Q+subcomponent+binding+protein+mitochondrial+OS+Homo+sapiens+GN+C1QBP+PE+1+S	-0.725695	-0.440773	-0.583234
CA2D1_HUMAN	Voltage+dependent+calcium+channel+subunit+alpha+2+delta+1+OS+Homo+sapiens+GN+CACNA2D1+PE+1+SV+3	-0.296914	-0.446739	-0.371827
CAH12_HUMAN	Carbonic+anhydrase+12+OS+Homo+sapiens+GN+CA12+PE+1+SV+1	0.130485	-0.566875	-0.218195
CAH14_HUMAN	Carbonic+anhydrase+14+OS+Homo+sapiens+GN+CA14+PE+1+SV+1	-0.557702	-0.503462	-0.530582
CALX_HUMAN	Calnexin+OS+Homo+sapiens+GN+CANX+PE+1+SV+2	-0.23021	0.0385202	-0.0958447
CB018_HUMAN	Transmembrane+protein+C2orf18+OS+Homo+sapiens+GN+C2orf18+PE+1+SV+1	0.0279718	0.214397	0.121184
CBPD_HUMAN	Carboxypeptidase+D+OS+Homo+sapiens+GN+CPD+PE+1+SV+2	-0.808116	0.376253	-0.215931
CC021_HUMAN	Uncharacterized+protein+C3orf21+OS+Homo+sapiens+GN+C3orf21+PE+2+SV+1	-0.686555	-0.316138	-0.501346
CD109_HUMAN	CD109+antigen+OS+Homo+sapiens+GN+CD109+PE+1+SV+2	0.0628528	0.120457	0.091655
CD166_HUMAN	CD166+antigen+OS+Homo+sapiens+GN+ALCAM+PE+1+SV+2	0.125621	-0.568329	-0.221354
CD44_HUMAN	CD44+antigen+OS+Homo+sapiens+GN+CD44+PE+1+SV+3	0.478801	-0.257401	0.1107
CD47_HUMAN	Leukocyte+surface+antigen+CD47+OS+Homo+sapiens+GN+CD47+PE+1+SV+1	0.137491	0.419183	0.278337
CD59_HUMAN	CD59+glycoprotein+OS+Homo+sapiens+GN+CD59+PE+1+SV+1	0.0694429	-0.324461	-0.127509
CD63_HUMAN	CD63+antigen+OS+Homo+sapiens+GN+CD63+PE+1+SV+2	0.464487	0.954469	0.709478
CD81_HUMAN	CD81+antigen+OS+Homo+sapiens+GN+CD81+PE+1+SV+1	0.296418	0.903002	0.59971
CDS2_HUMAN	Phosphatidate+cytidylyltransferase+2+OS+Homo+sapiens+GN+CDS2+PE+1+SV+1	-0.40811	0.0904075	-0.158851
CEPT1_HUMAN	Choline+ethanolaminephosphotransferase+1+OS+Homo+sapiens+GN+CEPT1+PE+1+SV+1	-0.834415	-0.397733	-0.616074
CF120_HUMAN	UPF0669+protein+C6orf120+OS+Homo+sapiens+GN+C6orf120+PE+1+SV+1	-0.351203	-0.499947	-0.425575
CH60_HUMAN	60+kDa+heat+shock+protein+mitochondrial+OS+Homo+sapiens+GN+HSPD1+PE+1+SV+2	0.609305	0.207959	0.408632
CI005_HUMAN	Transmembrane+protein+C9orf5+OS+Homo+sapiens+GN+C9orf5+PE+1+SV+2	-0.305198	0.484446	0.0896238
CISD2_HUMAN	CDGSH+iron+sulfur+domain+containing+protein+2+OS+Homo+sapiens+GN+CISD2+PE+1+SV+1	-0.172322	-0.145707	-0.159015
CK5P3_HUMAN	CDK5+regulatory+subunit+associated+protein+3+OS+Homo+sapiens+GN+CDK5RAP3+PE+1+SV+2	-0.571478	0.172265	-0.199606
CKAP4_HUMAN	Cytoskeleton+associated+protein+4+OS+Homo+sapiens+GN+CKAP4+PE+1+SV+2	-1.25234	-1.13202	-1.19218
CLCN3_HUMAN	H+Cl+exchange+transporter+3+OS+Homo+sapiens+GN+CLCN3+PE+1+SV+2	-0.297388	0.0757614	-0.110813
CMC1_HUMAN	Calcium+binding+mitochondrial+carrier+protein+Aralar1+OS+Homo+sapiens+GN+SLC25A12+PE+1+SV+2	-0.0485146	0.0412331	-0.00364078
CMC2_HUMAN	Calcium+binding+mitochondrial+carrier+protein+Aralar2+OS+Homo+sapiens+GN+SLC25A13+PE+1+SV+2	-0.103027	-0.0218524	-0.0624395
COMT_HUMAN	Catechol+O+methyltransferase+OS+Homo+sapiens+GN+COMT+PE+1+SV+2	-0.119005	-0.0997313	-0.109368
COX2_HUMAN	Cytochrome+c+oxidase+subunit+2+OS+Homo+sapiens+GN+MT+CO2+PE+1+SV+1	0.783521	1.14641	0.964966
CP058_HUMAN	UPF0420+protein+C16orf58+OS+Homo+sapiens+GN+C16orf58+PE+1+SV+2	-0.730964	-0.171926	-0.451445
CSF1_HUMAN	Macrophage+colony+stimulating+factor+1+OS+Homo+sapiens+GN+CSF1+PE+1+SV+2	-0.429766	-1.3126	-0.871185
CT030_HUMAN	UPF0414+transmembrane+protein+C20orf30+OS+Homo+sapiens+GN+C20orf30+PE+1+SV+1	0.878183	0.484475	0.681329
CTNA1_HUMAN	Catenin+alpha+1+OS+Homo+sapiens+GN+CTNNA1+PE+1+SV+1	0.30999	0.119875	0.214932
CTNB1_HUMAN	Catenin+beta+1+OS+Homo+sapiens+GN+CTNNB1+PE+1+SV+1	0.497168	0.559191	0.52818
CTND1_HUMAN	Catenin+delta+1+OS+Homo+sapiens+GN+CTNND1+PE+1+SV+1	0.0883266	0.879342	0.483834
CTR1_HUMAN	High+affinity+cationic+amino+acid+transporter+1+OS+Homo+sapiens+GN+SLC7A1+PE+1+SV+1	0.176036	0.649155	0.412595
CXAR_HUMAN	Coxsackievirus+and+adenovirus+receptor+OS+Homo+sapiens+GN+CXADR+PE+1+SV+1	-0.389067	-0.626755	-0.507911
CYB5B_HUMAN	Cytochrome+b5+type+B+OS+Homo+sapiens+GN+CYB5B+PE+1+SV+2	-0.200103	-0.170566	-0.185334
CYBR1_HUMAN	Cytochrome+b+reductase+1+OS+Homo+sapiens+GN+CYBRD1+PE+1+SV+1	-0.246529	-0.328336	-0.287433
DAD1_HUMAN	Dolichyl+diphosphooligosaccharide+protein+glycosyltransferase+subunit+DAD1+OS+Homo+sapiens+GN+DAD1	-0.298838	-0.18084	-0.239839
DDR2_HUMAN	Discoidin+domain+containing+receptor+2+OS+Homo+sapiens+GN+DDR2+PE+1+SV+2	-0.810149	0.991826	0.0908387
DDRGK_HUMAN	DDRGK+domain+containing+protein+1+OS+Homo+sapiens+GN+DDRGK1+PE+1+SV+2	-0.531884	-0.0158922	-0.273888
DEGS1_HUMAN	Sphingolipid+delta+4+desaturase+DES1+OS+Homo+sapiens+GN+DEGS1+PE+1+SV+1	-0.859814	-0.515924	-0.687869
DERL1_HUMAN	Derlin+1+OS+Homo+sapiens+GN+DERL1+PE+1+SV+1	-0.0833973	-0.560154	-0.321776
DGLB_HUMAN	Sn1+specific+diacylglycerol+lipase+beta+OS+Homo+sapiens+GN+DAGLB+PE+1+SV+2	0.273457	0.651016	0.462236
DHCR7_HUMAN	7+dehydrocholesterol+reductase+OS+Homo+sapiens+GN+DHCR7+PE+1+SV+1	-0.859486	-0.295318	-0.577402
DHSA_HUMAN	Succinate+dehydrogenase+ubiquinone+flavoprotein+subunit+mitochondrial+OS+Homo+sapiens+GN+SDHA+PE	-0.0476828	0.574842	0.263579
DIC_HUMAN	Mitochondrial+dicarboxylate+carrier+OS+Homo+sapiens+GN+SLC25A10+PE+1+SV+2	0.0687442	0.218011	0.143378
DJC13_HUMAN	DnaJ+homolog+subfamily+C+member+13+OS+Homo+sapiens+GN+DNAJC13+PE+1+SV+5	-0.460203	0.563872	0.0518349
DNJC5_HUMAN	DnaJ+homolog+subfamily+C+member+5+OS+Homo+sapiens+GN+DNAJC5+PE+1+SV+1	0.643282	0.512935	0.578108
DOPP1_HUMAN	Dolichyldiphosphatase+1+OS+Homo+sapiens+GN+DOLPP1+PE+1+SV+1	-0.480426	-0.289257	-0.384841
DPM1_HUMAN	Dolichol+phosphate+mannosyltransferase+OS+Homo+sapiens+GN+DPM1+PE+1+SV+1	-0.229953	0.199613	-0.0151696
DPM3_HUMAN	Dolichol+phosphate+mannosyltransferase+subunit+3+OS+Homo+sapiens+GN+DPM3+PE+1+SV+2	-0.197731	0.107134	-0.0452983
DRS7B_HUMAN	Dehydrogenase+reductase+SDR+family+member+7B+OS+Homo+sapiens+GN+DHRS7B+PE+1+SV+2	-0.197284	0.718403	0.260559
EMD_HUMAN	Emerin+OS+Homo+sapiens+GN+EMD+PE+1+SV+1	-0.415268	0.14578	-0.134744
ENDD1_HUMAN	Endonuclease+domain+containing+1+protein+OS+Homo+sapiens+GN+ENDOD1+PE+1+SV+2	-0.0791451	-0.672771	-0.375958
ERG24_HUMAN	Delta+14+sterol+reductase+OS+Homo+sapiens+GN+TM7SF2+PE+2+SV+3	-0.556037	-0.905549	-0.730793
ERGI1_HUMAN	Endoplasmic+reticulum+Golgi+intermediate+compartment+protein+1+OS+Homo+sapiens+GN+ERGIC1+PE+1+SV+1	-0.372902	-0.0414452	-0.207173
ERLN1_HUMAN	Erlin+1+OS+Homo+sapiens+GN+ERLIN1+PE+1+SV+1	-0.441755	0.0327205	-0.204517
ERLN2_HUMAN	Erlin+2+OS+Homo+sapiens+GN+ERLIN2+PE+1+SV+1	-0.17577	0.308241	0.0662352
ERMP1_HUMAN	Endoplasmic+reticulum+metallopeptidase+1+OS+Homo+sapiens+GN+ERMP1+PE+1+SV+2	-0.886528	-0.540834	-0.713681
FACE1_HUMAN	CAAX+prenyl+protease+1+homolog+OS+Homo+sapiens+GN+ZMPSTE24+PE+1+SV+2	-0.319062	-0.242543	-0.280803
FAF2_HUMAN	FAS+associated+factor+2+OS+Homo+sapiens+GN+FAF2+PE+1+SV+2	-0.0139482	-0.0194714	-0.0167098
FAM3C_HUMAN	Protein+FAM3C+OS+Homo+sapiens+GN+FAM3C+PE+1+SV+1	-0.93192	-0.61405	-0.772985
FLOT1_HUMAN	Flotillin+1+OS+Homo+sapiens+GN+FLOT1+PE+1+SV+3	-0.611208	-0.984668	-0.797938
FLOT2_HUMAN	Flotillin+2+OS+Homo+sapiens+GN+FLOT2+PE+1+SV+2	-0.65422	-0.543616	-0.598918
FND3A_HUMAN	Fibronectin+type+III+domain+containing+protein+3A+OS+Homo+sapiens+GN+FNDC3A+PE+1+SV+4	-0.616788	-0.248534	-0.432661
G6PT1_HUMAN	Glucose+6+phosphate+translocase+OS+Homo+sapiens+GN+SLC37A4+PE+1+SV+1	-0.718901	-0.249601	-0.484251
GALT2_HUMAN	Polypeptide+N+acetylgalactosaminyltransferase+2+OS+Homo+sapiens+GN+GALNT2+PE+1+SV+1	-0.662809	-0.730524	-0.696666
GBB1_HUMAN	Guanine+nucleotide+binding+protein+G+I+G+S+G+T+subunit+beta+1+OS+Homo+sapiens+GN+GNB1+PE+1+SV+3	-0.00929248	0.0305993	0.0106534
GBB2_HUMAN	Guanine+nucleotide+binding+protein+G+I+G+S+G+T+subunit+beta+2+OS+Homo+sapiens+GN+GNB2+PE+1+SV+3	0.452797	0.249781	0.351289
GBB4_HUMAN	Guanine+nucleotide+binding+protein+subunit+beta+4+OS+Homo+sapiens+GN+GNB4+PE+1+SV+3	0.384479	0.235965	0.310222
GBG12_HUMAN	Guanine+nucleotide+binding+protein+G+I+G+S+G+O+subunit+gamma+12+OS+Homo+sapiens+GN+GNG12+PE+1+SV	0.208295	-0.0227533	0.0927706
GBG4_HUMAN	Guanine+nucleotide+binding+protein+G+I+G+S+G+O+subunit+gamma+4+OS+Homo+sapiens+GN+GNG4+PE+1+SV+1	0.0930386	0.138623	0.115831
GBG5_HUMAN	Guanine+nucleotide+binding+protein+G+I+G+S+G+O+subunit+gamma+5+OS+Homo+sapiens+GN+GNG5+PE+1+SV+3	-0.0738388	-0.125134	-0.0994866
GHC1_HUMAN	Mitochondrial+glutamate+carrier+1+OS+Homo+sapiens+GN+SLC25A22+PE+1+SV+1	-0.244659	-0.488448	-0.366554
GL8D1_HUMAN	Glycosyltransferase+8+domain+containing+protein+1+OS+Homo+sapiens+GN+GLT8D1+PE+1+SV+2	-0.507705	0.0060502	-0.250828
GLCM_HUMAN	Glucosylceramidase+OS+Homo+sapiens+GN+GBA+PE+1+SV+3	-0.609688	0.255608	-0.17704
GNA11_HUMAN	Guanine+nucleotide+binding+protein+subunit+alpha+11+OS+Homo+sapiens+GN+GNA11+PE+1+SV+2	0.056279	0.295554	0.175916
GNA14_HUMAN	Guanine+nucleotide+binding+protein+subunit+alpha+14+OS+Homo+sapiens+GN+GNA14+PE+2+SV+1	-0.92828	-0.101493	-0.514886
GNAI1_HUMAN	Guanine+nucleotide+binding+protein+G+i+subunit+alpha+1+OS+Homo+sapiens+GN+GNAI1+PE+1+SV+2	-0.25077	-0.366194	-0.308482
GNAI2_HUMAN	Guanine+nucleotide+binding+protein+G+i+subunit+alpha+2+OS+Homo+sapiens+GN+GNAI2+PE+1+SV+3	0.341578	0.0929847	0.217281
GNAI3_HUMAN	Guanine+nucleotide+binding+protein+G+k+subunit+alpha+OS+Homo+sapiens+GN+GNAI3+PE+1+SV+3	0.130897	0.0349777	0.0829374
GNAL_HUMAN	Guanine+nucleotide+binding+protein+G+olf+subunit+alpha+OS+Homo+sapiens+GN+GNAL+PE+1+SV+1	1.4906	0.0275499	0.759073
GNAO_HUMAN	Guanine+nucleotide+binding+protein+G+o+subunit+alpha+OS+Homo+sapiens+GN+GNAO1+PE+1+SV+4	0.5297	0.688154	0.608927
GNAQ_HUMAN	Guanine+nucleotide+binding+protein+G+q+subunit+alpha+OS+Homo+sapiens+GN+GNAQ+PE+1+SV+4	-0.0910481	0.0158766	-0.0375857
GNAS2_HUMAN	Guanine+nucleotide+binding+protein+G+s+subunit+alpha+isoforms+short+OS+Homo+sapiens+GN+GNAS+PE+1+SV	-0.171336	0.144234	-0.0135512
GOGB1_HUMAN	Golgin+subfamily+B+member+1+OS+Homo+sapiens+GN+GOLGB1+PE+1+SV+2	-0.86594	-0.991872	-0.928906
GOLI4_HUMAN	Golgi+integral+membrane+protein+4+OS+Homo+sapiens+GN+GOLIM4+PE+1+SV+1	-1.13117	-1.02245	-1.07681
GOLM1_HUMAN	Golgi+membrane+protein+1+OS+Homo+sapiens+GN+GOLM1+PE+1+SV+1	-0.558716	-0.294332	-0.426524
GPC1_HUMAN	Glypican+1+OS+Homo+sapiens+GN+GPC1+PE+1+SV+2	0.288512	0.135619	0.212065
GPC4_HUMAN	Glypican+4+OS+Homo+sapiens+GN+GPC4+PE+1+SV+4	0.368059	0.212797	0.290428
GPI8_HUMAN	GPI+anchor+transamidase+OS+Homo+sapiens+GN+PIGK+PE+1+SV+2	-0.578872	-0.343813	-0.461342
GRP75_HUMAN	Stress+70+protein+mitochondrial+OS+Homo+sapiens+GN+HSPA9+PE+1+SV+2	-0.280456	0.265234	-0.00761123
GRP78_HUMAN	78+kDa+glucose+regulated+protein+OS+Homo+sapiens+GN+HSPA5+PE+1+SV+2	-0.77167	-0.223256	-0.497463
GSLG1_HUMAN	Golgi+apparatus+protein+1+OS+Homo+sapiens+GN+GLG1+PE+1+SV+2	-0.518646	-0.234425	-0.376536
GTR1_HUMAN	Solute+carrier+family+2+facilitated+glucose+transporter+member+1+OS+Homo+sapiens+GN+SLC2A1+PE+1+SV	0.261915	1.32883	0.795372
HACD3_HUMAN	3+hydroxyacyl+CoA+dehydratase+3+OS+Homo+sapiens+GN+PTPLAD1+PE+1+SV+2	-0.421101	-0.124023	-0.272562
HBXIP_HUMAN	Hepatitis+B+virus+X+interacting+protein+OS+Homo+sapiens+GN+HBXIP+PE+1+SV+1	-0.0598019	-0.126928	-0.093365
HLAE_HUMAN	HLA+class+I+histocompatibility+antigen+alpha+chain+E+OS+Homo+sapiens+GN+HLA+E+PE+1+SV+3	0.481397	-0.52994	-0.0242716
HM13_HUMAN	Minor+histocompatibility+antigen+H13+OS+Homo+sapiens+GN+HM13+PE+1+SV+1	-0.392632	-0.214945	-0.303789
HMOX2_HUMAN	Heme+oxygenase+2+OS+Homo+sapiens+GN+HMOX2+PE+1+SV+2	-0.33871	-0.0590433	-0.198877
HS2ST_HUMAN	Heparan+sulfate+2+O+sulfotransferase+1+OS+Homo+sapiens+GN+HS2ST1+PE+1+SV+1	-0.537762	-0.68547	-0.611616
HS71L_HUMAN	Heat+shock+70+kDa+protein+1+like+OS+Homo+sapiens+GN+HSPA1L+PE+1+SV+2	-0.265096	0.188785	-0.0381557
HS90B_HUMAN	Heat+shock+protein+HSP+90+beta+OS+Homo+sapiens+GN+HSP90AB1+PE+1+SV+4	0.471611	0.280515	0.376063
HSP71_HUMAN	Heat+shock+70+kDa+protein+1A+1B+OS+Homo+sapiens+GN+HSPA1A+PE+1+SV+5	-0.215996	-0.262672	-0.239334
HSP72_HUMAN	Heat+shock+related+70+kDa+protein+2+OS+Homo+sapiens+GN+HSPA2+PE+1+SV+1	-0.481479	-0.0159566	-0.248718
HSP76_HUMAN	Heat+shock+70+kDa+protein+6+OS+Homo+sapiens+GN+HSPA6+PE+1+SV+2	-0.612188	-0.214526	-0.413357
HSP7C_HUMAN	Heat+shock+cognate+71+kDa+protein+OS+Homo+sapiens+GN+HSPA8+PE+1+SV+1	0.0202548	0.125292	0.0727732
HYEP_HUMAN	Epoxide+hydrolase+1+OS+Homo+sapiens+GN+EPHX1+PE+1+SV+1	-0.0448522	0.568173	0.261661
IKIP_HUMAN	Inhibitor+of+nuclear+factor+kappa+B+kinase+interacting+protein+OS+Homo+sapiens+GN+IKBIP+PE+1+SV+1	-0.877566	-0.348566	-0.613066
IMPA3_HUMAN	Inositol+monophosphatase+3+OS+Homo+sapiens+GN+IMPAD1+PE+1+SV+1	-0.652546	-0.615259	-0.633903
IR3IP_HUMAN	Immediate+early+response+3+interacting+protein+1+OS+Homo+sapiens+GN+IER3IP1+PE+1+SV+1	-0.697373	-0.589655	-0.643514
ITA2_HUMAN	Integrin+alpha+2+OS+Homo+sapiens+GN+ITGA2+PE+1+SV+1	0.29604	0.0933473	0.194694
ITAV_HUMAN	Integrin+alpha+V+OS+Homo+sapiens+GN+ITGAV+PE+1+SV+2	-0.107408	0.665323	0.278957
ITB1_HUMAN	Integrin+beta+1+OS+Homo+sapiens+GN+ITGB1+PE+1+SV+2	0.0919686	0.233505	0.162737
ITB5_HUMAN	Integrin+beta+5+OS+Homo+sapiens+GN+ITGB5+PE+1+SV+1	-0.108843	0.51515	0.203153
ITM2B_HUMAN	Integral+membrane+protein+2B+OS+Homo+sapiens+GN+ITM2B+PE+1+SV+1	-0.858891	-0.840727	-0.849809
JAGN1_HUMAN	Protein+jagunal+homolog+1+OS+Homo+sapiens+GN+JAGN1+PE+1+SV+1	-0.564129	0.204824	-0.179652
JAM1_HUMAN	Junctional+adhesion+molecule+A+OS+Homo+sapiens+GN+F11R+PE+1+SV+1	-1.01953	-0.320945	-0.670239
K0090_HUMAN	Uncharacterized+protein+KIAA0090+OS+Homo+sapiens+GN+KIAA0090+PE+1+SV+1	-0.508957	0.0718932	-0.218532
K1C10_HUMAN	Keratin+type+I+cytoskeletal+10+OS+Homo+sapiens+GN+KRT10+PE+1+SV+6	0.258001	-0.849783	-0.295891
K1C13_HUMAN	Keratin+type+I+cytoskeletal+13+OS+Homo+sapiens+GN+KRT13+PE+1+SV+4	0.401038	-1.94588	-0.772423
K1C14_HUMAN	Keratin+type+I+cytoskeletal+14+OS+Homo+sapiens+GN+KRT14+PE+1+SV+4	-0.80996	0.307194	-0.251383
K1C16_HUMAN	Keratin+type+I+cytoskeletal+16+OS+Homo+sapiens+GN+KRT16+PE+1+SV+4	0.268604	-2.67039	-1.20089
K1C9_HUMAN	Keratin+type+I+cytoskeletal+9+OS+Homo+sapiens+GN+KRT9+PE+1+SV+3	-0.0141332	-0.636	-0.325066
K22E_HUMAN	Keratin+type+II+cytoskeletal+2+epidermal+OS+Homo+sapiens+GN+KRT2+PE+1+SV+2	0.25362	-0.909195	-0.327788
K2C1_HUMAN	Keratin+type+II+cytoskeletal+1+OS+Homo+sapiens+GN+KRT1+PE+1+SV+6	0.118579	-1.00427	-0.442844
K2C1B_HUMAN	Keratin+type+II+cytoskeletal+1b+OS+Homo+sapiens+GN+KRT77+PE+1+SV+3	-0.13674	-0.197085	-0.166913
K2C5_HUMAN	Keratin+type+II+cytoskeletal+5+OS+Homo+sapiens+GN+KRT5+PE+1+SV+3	0.407501	-0.849282	-0.220891
K2C6B_HUMAN	Keratin+type+II+cytoskeletal+6B+OS+Homo+sapiens+GN+KRT6B+PE+1+SV+5	0.132892	-0.332186	-0.0996469
KPYM_HUMAN	Pyruvate+kinase+isozymes+M1+M2+OS+Homo+sapiens+GN+PKM2+PE+1+SV+4	0.502299	1.09279	0.797546
KTN1_HUMAN	Kinectin+OS+Homo+sapiens+GN+KTN1+PE+1+SV+1	-0.493126	-0.162142	-0.327634
LAMP2_HUMAN	Lysosome+associated+membrane+glycoprotein+2+OS+Homo+sapiens+GN+LAMP2+PE+1+SV+2	-0.422823	0.711682	0.14443
LAP2B_HUMAN	Lamina+associated+polypeptide+2+isoforms+beta+gamma+OS+Homo+sapiens+GN+TMPO+PE+1+SV+2	-0.679361	-0.595234	-0.637297
LASS2_HUMAN	LAG1+longevity+assurance+homolog+2+OS+Homo+sapiens+GN+LASS2+PE+1+SV+1	-0.632629	-0.539539	-0.586084
LAT1_HUMAN	Large+neutral+amino+acids+transporter+small+subunit+1+OS+Homo+sapiens+GN+SLC7A5+PE+1+SV+2	0.198944	0.369503	0.284224
LBR_HUMAN	Lamin+B+receptor+OS+Homo+sapiens+GN+LBR+PE+1+SV+2	-0.70843	-0.141616	-0.425023
LCAP_HUMAN	Leucyl+cystinyl+aminopeptidase+OS+Homo+sapiens+GN+LNPEP+PE+1+SV+3	-0.257435	1.08797	0.415265
LCLT1_HUMAN	Lysocardiolipin+acyltransferase+1+OS+Homo+sapiens+GN+LCLAT1+PE+1+SV+1	-0.357031	0.211888	-0.0725714
LMAN1_HUMAN	Protein+ERGIC+53+OS+Homo+sapiens+GN+LMAN1+PE+1+SV+2	-0.823389	-0.81839	-0.82089
LMAN2_HUMAN	Vesicular+integral+membrane+protein+VIP36+OS+Homo+sapiens+GN+LMAN2+PE+1+SV+1	-0.102994	0.192669	0.0448373
LMBD2_HUMAN	LMBR1+domain+containing+protein+2+OS+Homo+sapiens+GN+LMBRD2+PE+1+SV+1	0.0978213	0.149162	0.123492
LMTK2_HUMAN	Serine+threonine+protein+kinase+LMTK2+OS+Homo+sapiens+GN+LMTK2+PE+1+SV+2	-0.110612	0.695975	0.292682
LRC59_HUMAN	Leucine+rich+repeat+containing+protein+59+OS+Homo+sapiens+GN+LRRC59+PE+1+SV+1	-0.128687	-0.573985	-0.351336
LRC8D_HUMAN	Leucine+rich+repeat+containing+protein+8D+OS+Homo+sapiens+GN+LRRC8D+PE+1+SV+1	0.432936	0.907596	0.670266
LRP1_HUMAN	Prolow+density+lipoprotein+receptor+related+protein+1+OS+Homo+sapiens+GN+LRP1+PE+1+SV+2	-0.0539892	1.08026	0.513137
LRP8_HUMAN	Low+density+lipoprotein+receptor+related+protein+8+OS+Homo+sapiens+GN+LRP8+PE+1+SV+4	-0.41511	0.184381	-0.115364
LSG1_HUMAN	Large+subunit+GTPase+1+homolog+OS+Homo+sapiens+GN+LSG1+PE+1+SV+2	-0.0354836	-0.402371	-0.218928
LTOR1_HUMAN	Ragulator+complex+protein+LAMTOR1+OS+Homo+sapiens+GN+LAMTOR1+PE+1+SV+2	-0.022864	0.0195556	-0.00165419
LTOR2_HUMAN	Ragulator+complex+protein+LAMTOR2+OS+Homo+sapiens+GN+LAMTOR2+PE+1+SV+1	-0.0292315	0.122242	0.0465052
LTOR3_HUMAN	Ragulator+complex+protein+LAMTOR3+OS+Homo+sapiens+GN+LAMTOR3+PE+1+SV+1	-0.142953	0.0586446	-0.0421542
LYN_HUMAN	Tyrosine+protein+kinase+Lyn+OS+Homo+sapiens+GN+LYN+PE+1+SV+3	0.767915	0.573932	0.670924
M2OM_HUMAN	Mitochondrial+2+oxoglutarate+malate+carrier+protein+OS+Homo+sapiens+GN+SLC25A11+PE+1+SV+3	0.0227109	-0.122657	-0.0499728
MAGT1_HUMAN	Magnesium+transporter+protein+1+OS+Homo+sapiens+GN+MAGT1+PE+1+SV+1	-0.759258	-0.166293	-0.462776
MARCS_HUMAN	Myristoylated+alanine+rich+C+kinase+substrate+OS+Homo+sapiens+GN+MARCKS+PE+1+SV+4	0.103783	0.262976	0.18338
MAVS_HUMAN	Mitochondrial+antiviral+signaling+protein+OS+Homo+sapiens+GN+MAVS+PE+1+SV+2	-0.434469	-0.46987	-0.45217
MBOA7_HUMAN	Lysophospholipid+acyltransferase+7+OS+Homo+sapiens+GN+MBOAT7+PE+1+SV+2	-0.513752	-0.169752	-0.341752
MDHM_HUMAN	Malate+dehydrogenase+mitochondrial+OS+Homo+sapiens+GN+MDH2+PE+1+SV+3	0.398964	0.884719	0.641842
MFGM_HUMAN	Lactadherin+OS+Homo+sapiens+GN+MFGE8+PE+1+SV+2	-0.348473	-0.536566	-0.44252
MFS10_HUMAN	Major+facilitator+superfamily+domain+containing+protein+10+OS+Homo+sapiens+GN+MFSD10+PE+2+SV+1	-0.859283	-0.743627	-0.801455
MFSD6_HUMAN	Major+facilitator+superfamily+domain+containing+protein+6+OS+Homo+sapiens+GN+MFSD6+PE+1+SV+2	-0.509037	0.0682216	-0.220408
MGST1_HUMAN	Microsomal+glutathione+S+transferase+1+OS+Homo+sapiens+GN+MGST1+PE+1+SV+1	-0.177397	0.097829	-0.0397841
MGST3_HUMAN	Microsomal+glutathione+S+transferase+3+OS+Homo+sapiens+GN+MGST3+PE+1+SV+1	-1.40989	-1.06862	-1.23926
MLEC_HUMAN	Malectin+OS+Homo+sapiens+GN+MLEC+PE+1+SV+1	-0.451921	-0.0498233	-0.250872
MMP14_HUMAN	Matrix+metalloproteinase+14+OS+Homo+sapiens+GN+MMP14+PE+1+SV+3	-0.607635	-1.17638	-0.892005
MOES_HUMAN	Moesin+OS+Homo+sapiens+GN+MSN+PE+1+SV+3	0.138716	0.739509	0.439112
MOT1_HUMAN	Monocarboxylate+transporter+1+OS+Homo+sapiens+GN+SLC16A1+PE+1+SV+3	-0.0620381	-0.75415	-0.408094
MPCP_HUMAN	Phosphate+carrier+protein+mitochondrial+OS+Homo+sapiens+GN+SLC25A3+PE+1+SV+2	0.162391	0.191225	0.176808
MPRD_HUMAN	Cation+dependent+mannose+6+phosphate+receptor+OS+Homo+sapiens+GN+M6PR+PE+1+SV+1	-0.381765	0.242798	-0.0694836
MPRI_HUMAN	Cation+independent+mannose+6+phosphate+receptor+OS+Homo+sapiens+GN+IGF2R+PE+1+SV+3	-0.419499	0.795335	0.187918
MPU1_HUMAN	Mannose+P+dolichol+utilization+defect+1+protein+OS+Homo+sapiens+GN+MPDU1+PE+1+SV+2	-0.0411404	-0.00457104	-0.0228557
MRC2_HUMAN	C+type+mannose+receptor+2+OS+Homo+sapiens+GN+MRC2+PE+1+SV+2	0.163452	1.17576	0.669603
MUC18_HUMAN	Cell+surface+glycoprotein+MUC18+OS+Homo+sapiens+GN+MCAM+PE+1+SV+2	0.248119	-0.159724	0.0441975
MYADM_HUMAN	Myeloid+associated+differentiation+marker+OS+Homo+sapiens+GN+MYADM+PE+1+SV+2	-0.176441	0.116969	-0.029736
MYOF_HUMAN	Myoferlin+OS+Homo+sapiens+GN+MYOF+PE+1+SV+1	-0.411935	0.649595	0.11883
NB5R1_HUMAN	NADH+cytochrome+b5+reductase+1+OS+Homo+sapiens+GN+CYB5R1+PE+1+SV+1	-0.577338	-0.81653	-0.696934
NB5R3_HUMAN	NADH+cytochrome+b5+reductase+3+OS+Homo+sapiens+GN+CYB5R3+PE+1+SV+3	-0.0994871	-0.486204	-0.292846
NCAM1_HUMAN	Neural+cell+adhesion+molecule+1+OS+Homo+sapiens+GN+NCAM1+PE+1+SV+3	0.597639	0.343273	0.470456
NCLN_HUMAN	Nicalin+OS+Homo+sapiens+GN+NCLN+PE+1+SV+2	-0.883351	-0.28832	-0.585835
NCPR_HUMAN	NADPH+cytochrome+P450+reductase+OS+Homo+sapiens+GN+POR+PE+1+SV+2	-0.255081	0.106629	-0.0742262
NDUS1_HUMAN	NADH+ubiquinone+oxidoreductase+75+kDa+subunit+mitochondrial+OS+Homo+sapiens+GN+NDUFS1+PE+1+SV+3	0.652199	0.575286	0.613743
NHRF1_HUMAN	Na+H+exchange+regulatory+cofactor+NHE+RF1+OS+Homo+sapiens+GN+SLC9A3R1+PE+1+SV+4	-0.154665	0.845815	0.345575
NICA_HUMAN	Nicastrin+OS+Homo+sapiens+GN+NCSTN+PE+1+SV+2	-0.251493	0.657708	0.203107
NNTM_HUMAN	NAD+P+transhydrogenase+mitochondrial+OS+Homo+sapiens+GN+NNT+PE+1+SV+3	-0.202086	-0.0562798	-0.129183
NOMO2_HUMAN	Nodal+modulator+2+OS+Homo+sapiens+GN+NOMO2+PE+1+SV+1	-0.537638	0.0898575	-0.22389
NOMO3_HUMAN	Nodal+modulator+3+OS+Homo+sapiens+GN+NOMO3+PE+2+SV+2	-0.875891	-0.315304	-0.595597
NRCAM_HUMAN	Neuronal+cell+adhesion+molecule+OS+Homo+sapiens+GN+NRCAM+PE+1+SV+3	1.18106	0.834989	1.00803
OCAD1_HUMAN	OCIA+domain+containing+protein+1+OS+Homo+sapiens+GN+OCIAD1+PE+1+SV+1	0.282292	0.220049	0.251171
OSBL8_HUMAN	Oxysterol+binding+protein+related+protein+8+OS+Homo+sapiens+GN+OSBPL8+PE+1+SV+3	0.0220325	0.175243	0.0986376
OSPT_HUMAN	Protein+osteopotentia+homolog+OS+Homo+sapiens+GN+C1orf9+PE+2+SV+1	-1.29615	-1.39626	-1.34621
OST48_HUMAN	Dolichyl+diphosphooligosaccharide+protein+glycosyltransferase+48+kDa+subunit+OS+Homo+sapiens+GN+DDO	-0.71188	-0.17686	-0.44437
OSTC_HUMAN	Oligosaccharyltransferase+complex+subunit+OSTC+OS+Homo+sapiens+GN+OSTC+PE+1+SV+1	-0.698481	-0.678109	-0.688295
P4K2A_HUMAN	Phosphatidylinositol+4+kinase+type+2+alpha+OS+Homo+sapiens+GN+PI4K2A+PE+1+SV+1	0.397341	0.189574	0.293458
PBIP1_HUMAN	Pre+B+cell+leukemia+transcription+factor+interacting+protein+1+OS+Homo+sapiens+GN+PBXIP1+PE+1+SV+1	-1.14824	-1.13965	-1.14395
PCY1A_HUMAN	Choline+phosphate+cytidylyltransferase+A+OS+Homo+sapiens+GN+PCYT1A+PE+1+SV+2	0.686597	1.17899	0.932795
PDIA1_HUMAN	Protein+disulfide+isomerase+OS+Homo+sapiens+GN+P4HB+PE+1+SV+3	-1.01029	-0.717879	-0.864084
PEX10_HUMAN	Peroxisome+biogenesis+factor+10+OS+Homo+sapiens+GN+PEX10+PE+1+SV+1	-0.945538	0.124567	-0.410485
PGK1_HUMAN	Phosphoglycerate+kinase+1+OS+Homo+sapiens+GN+PGK1+PE+1+SV+3	0.653952	0.751948	0.70295
PGRC1_HUMAN	Membrane+associated+progesterone+receptor+component+1+OS+Homo+sapiens+GN+PGRMC1+PE+1+SV+3	-0.234662	-0.0490457	-0.141854
PGRC2_HUMAN	Membrane+associated+progesterone+receptor+component+2+OS+Homo+sapiens+GN+PGRMC2+PE+1+SV+1	-0.657463	-0.455136	-0.556299
PHB_HUMAN	Prohibitin+OS+Homo+sapiens+GN+PHB+PE+1+SV+1	0.241964	0.590466	0.416215
PHB2_HUMAN	Prohibitin+2+OS+Homo+sapiens+GN+PHB2+PE+1+SV+2	0.127398	0.436684	0.282041
PIGO_HUMAN	GPI+ethanolamine+phosphate+transferase+3+OS+Homo+sapiens+GN+PIGO+PE+2+SV+3	-1.13464	-0.326149	-0.730397
PIGS_HUMAN	GPI+transamidase+component+PIG+S+OS+Homo+sapiens+GN+PIGS+PE+1+SV+3	-0.647993	-0.339184	-0.493588
PIGT_HUMAN	GPI+transamidase+component+PIG+T+OS+Homo+sapiens+GN+PIGT+PE+1+SV+1	-0.707414	-0.0452547	-0.376334
PIGU_HUMAN	Phosphatidylinositol+glycan+anchor+biosynthesis+class+U+protein+OS+Homo+sapiens+GN+PIGU+PE+1+SV+3	-0.173754	-0.163401	-0.168578
PLCC_HUMAN	1+acyl+sn+glycerol+3+phosphate+acyltransferase+gamma+OS+Homo+sapiens+GN+AGPAT3+PE+1+SV+1	0.427337	0.251667	0.339502
PLIN3_HUMAN	Perilipin+3+OS+Homo+sapiens+GN+PLIN3+PE+1+SV+3	0.0870324	0.450234	0.268633
PLIN4_HUMAN	Perilipin+4+OS+Homo+sapiens+GN+PLIN4+PE+2+SV+2	-0.631044	-0.759594	-0.695319
PLXB2_HUMAN	Plexin+B2+OS+Homo+sapiens+GN+PLXNB2+PE+1+SV+3	-0.230142	-0.168918	-0.19953
PM34_HUMAN	Peroxisomal+membrane+protein+PMP34+OS+Homo+sapiens+GN+SLC25A17+PE+1+SV+1	-1.14121	-0.366014	-0.753611
PODXL_HUMAN	Podocalyxin+OS+Homo+sapiens+GN+PODXL+PE+1+SV+2	-0.0988574	0.759254	0.330199
PP1B_HUMAN	Serine+threonine+protein+phosphatase+PP1+beta+catalytic+subunit+OS+Homo+sapiens+GN+PPP1CB+PE+1+SV+3	-1.03268	-0.128086	-0.580382
PP1G_HUMAN	Serine+threonine+protein+phosphatase+PP1+gamma+catalytic+subunit+OS+Homo+sapiens+GN+PPP1CC+PE+1+SV+1	-0.0438105	1.01435	0.485271
PPIA_HUMAN	Peptidyl+prolyl+cis+trans+isomerase+A+OS+Homo+sapiens+GN+PPIA+PE+1+SV+2	0.578067	0.177034	0.37755
PRAF2_HUMAN	PRA1+family+protein+2+OS+Homo+sapiens+GN+PRAF2+PE+1+SV+1	-0.581351	-0.1009	-0.341126
PRAF3_HUMAN	PRA1+family+protein+3+OS+Homo+sapiens+GN+ARL6IP5+PE+1+SV+1	-0.442635	-0.55241	-0.497522
PRDX1_HUMAN	Peroxiredoxin+1+OS+Homo+sapiens+GN+PRDX1+PE+1+SV+1	0.371537	0.699646	0.535592
PREB_HUMAN	Prolactin+regulatory+element+binding+protein+OS+Homo+sapiens+GN+PREB+PE+1+SV+2	-0.176759	-0.668167	-0.422463
PTH2_HUMAN	Peptidyl+tRNA+hydrolase+2+mitochondrial+OS+Homo+sapiens+GN+PTRH2+PE+1+SV+1	-0.476847	-0.28759	-0.382219
PTK7_HUMAN	Inactive+tyrosine+protein+kinase+7+OS+Homo+sapiens+GN+PTK7+PE+1+SV+2	-0.294307	-0.173056	-0.233682
PTN1_HUMAN	Tyrosine+protein+phosphatase+non+receptor+type+1+OS+Homo+sapiens+GN+PTPN1+PE+1+SV+1	-0.328099	0.32438	-0.00185946
PTPRF_HUMAN	Receptor+type+tyrosine+protein+phosphatase+F+OS+Homo+sapiens+GN+PTPRF+PE+1+SV+2	-0.0418404	0.371665	0.164912
PX11B_HUMAN	Peroxisomal+membrane+protein+11B+OS+Homo+sapiens+GN+PEX11B+PE+1+SV+1	-1.33256	-0.178791	-0.755674
QCR1_HUMAN	Cytochrome+b+c1+complex+subunit+1+mitochondrial+OS+Homo+sapiens+GN+UQCRC1+PE+1+SV+3	0.445339	0.495231	0.470285
QCR2_HUMAN	Cytochrome+b+c1+complex+subunit+2+mitochondrial+OS+Homo+sapiens+GN+UQCRC2+PE+1+SV+3	0.395342	0.561133	0.478237
RAB10_HUMAN	Ras+related+protein+Rab+10+OS+Homo+sapiens+GN+RAB10+PE+1+SV+1	-0.232862	-0.382733	-0.307798
RAB12_HUMAN	Ras+related+protein+Rab+12+OS+Homo+sapiens+GN+RAB12+PE+1+SV+3	0.336484	0.421687	0.379085
RAB14_HUMAN	Ras+related+protein+Rab+14+OS+Homo+sapiens+GN+RAB14+PE+1+SV+4	0.233769	0.497857	0.365813
RAB15_HUMAN	Ras+related+protein+Rab+15+OS+Homo+sapiens+GN+RAB15+PE+1+SV+1	0.593309	-0.725184	-0.0659378
RAB18_HUMAN	Ras+related+protein+Rab+18+OS+Homo+sapiens+GN+RAB18+PE+1+SV+1	-0.659232	-0.747615	-0.703423
RAB1A_HUMAN	Ras+related+protein+Rab+1A+OS+Homo+sapiens+GN+RAB1A+PE+1+SV+3	0.35242	0.230598	0.291509
RAB1B_HUMAN	Ras+related+protein+Rab+1B+OS+Homo+sapiens+GN+RAB1B+PE+1+SV+1	-0.00128467	0.162297	0.0805062
RAB21_HUMAN	Ras+related+protein+Rab+21+OS+Homo+sapiens+GN+RAB21+PE+1+SV+3	-0.292424	0.0389335	-0.126746
RAB2A_HUMAN	Ras+related+protein+Rab+2A+OS+Homo+sapiens+GN+RAB2A+PE+1+SV+1	-0.231659	-0.0219757	-0.126817
RAB2B_HUMAN	Ras+related+protein+Rab+2B+OS+Homo+sapiens+GN+RAB2B+PE+1+SV+1	-0.278342	-0.44273	-0.360536
RAB35_HUMAN	Ras+related+protein+Rab+35+OS+Homo+sapiens+GN+RAB35+PE+1+SV+1	-0.0939328	-0.0395874	-0.0667601
RAB3A_HUMAN	Ras+related+protein+Rab+3A+OS+Homo+sapiens+GN+RAB3A+PE+1+SV+1	-0.790405	-0.764655	-0.77753
RAB3B_HUMAN	Ras+related+protein+Rab+3B+OS+Homo+sapiens+GN+RAB3B+PE+1+SV+2	-0.0951181	-0.329391	-0.212255
RAB3C_HUMAN	Ras+related+protein+Rab+3C+OS+Homo+sapiens+GN+RAB3C+PE+2+SV+1	-0.0398957	-1.22567	-0.632783
RAB3D_HUMAN	Ras+related+protein+Rab+3D+OS+Homo+sapiens+GN+RAB3D+PE+1+SV+1	-0.669006	-0.491805	-0.580405
RAB4A_HUMAN	Ras+related+protein+Rab+4A+OS+Homo+sapiens+GN+RAB4A+PE+1+SV+2	0.19203	0.294257	0.243143
RAB4B_HUMAN	Ras+related+protein+Rab+4B+OS+Homo+sapiens+GN+RAB4B+PE+1+SV+1	-0.334109	0.197824	-0.0681425
RAB5A_HUMAN	Ras+related+protein+Rab+5A+OS+Homo+sapiens+GN+RAB5A+PE+1+SV+2	0.0132891	-0.0720023	-0.0293566
RAB5B_HUMAN	Ras+related+protein+Rab+5B+OS+Homo+sapiens+GN+RAB5B+PE+1+SV+1	-0.331807	-0.249865	-0.290836
RAB5C_HUMAN	Ras+related+protein+Rab+5C+OS+Homo+sapiens+GN+RAB5C+PE+1+SV+2	0.314924	0.2369	0.275912
RAB6A_HUMAN	Ras+related+protein+Rab+6A+OS+Homo+sapiens+GN+RAB6A+PE+1+SV+3	-0.647157	-0.343866	-0.495511
RAB6B_HUMAN	Ras+related+protein+Rab+6B+OS+Homo+sapiens+GN+RAB6B+PE+1+SV+1	-0.603328	-0.293993	-0.448661
RAB6C_HUMAN	Ras+related+protein+Rab+6C+OS+Homo+sapiens+GN+RAB6C+PE+2+SV+2	-0.454479	-0.17565	-0.315064
RAB7A_HUMAN	Ras+related+protein+Rab+7a+OS+Homo+sapiens+GN+RAB7A+PE+1+SV+1	-0.213718	-0.0606195	-0.137169
RAB7L_HUMAN	Ras+related+protein+Rab+7L1+OS+Homo+sapiens+GN+RAB7L1+PE+1+SV+1	-1.07469	-0.415609	-0.745151
RAB8A_HUMAN	Ras+related+protein+Rab+8A+OS+Homo+sapiens+GN+RAB8A+PE+1+SV+1	-0.407717	-1.09076	-0.749239
RAB8B_HUMAN	Ras+related+protein+Rab+8B+OS+Homo+sapiens+GN+RAB8B+PE+1+SV+2	-0.00821575	-1.15091	-0.579562
RAC1_HUMAN	Ras+related+C3+botulinum+toxin+substrate+1+OS+Homo+sapiens+GN+RAC1+PE+1+SV+1	0.346944	0.304769	0.325857
RALA_HUMAN	Ras+related+protein+Ral+A+OS+Homo+sapiens+GN+RALA+PE+1+SV+1	0.273356	-0.331393	-0.0290187
RAP1A_HUMAN	Ras+related+protein+Rap+1A+OS+Homo+sapiens+GN+RAP1A+PE+1+SV+1	-0.332425	-0.150072	-0.241249
RAP2A_HUMAN	Ras+related+protein+Rap+2a+OS+Homo+sapiens+GN+RAP2A+PE+1+SV+1	0.269997	0.15726	0.213628
RAP2B_HUMAN	Ras+related+protein+Rap+2b+OS+Homo+sapiens+GN+RAP2B+PE+1+SV+1	-0.333987	-0.312703	-0.323345
RAP2C_HUMAN	Ras+related+protein+Rap+2c+OS+Homo+sapiens+GN+RAP2C+PE+1+SV+1	0.230326	0.0510038	0.140665
RASH_HUMAN	GTPase+HRas+OS+Homo+sapiens+GN+HRAS+PE+1+SV+1	0.0405377	-0.62309	-0.291276
RASN_HUMAN	GTPase+NRas+OS+Homo+sapiens+GN+NRAS+PE+1+SV+1	0.290904	0.156295	0.223599
RB11A_HUMAN	Ras+related+protein+Rab+11A+OS+Homo+sapiens+GN+RAB11A+PE+1+SV+3	-0.745308	-0.475754	-0.610531
RB11B_HUMAN	Ras+related+protein+Rab+11B+OS+Homo+sapiens+GN+RAB11B+PE+1+SV+4	0.0359176	0.864834	0.450376
RB39A_HUMAN	Ras+related+protein+Rab+39A+OS+Homo+sapiens+GN+RAB39+PE+2+SV+2	0.822876	-0.306702	0.258087
RB39B_HUMAN	Ras+related+protein+Rab+39B+OS+Homo+sapiens+GN+RAB39B+PE+1+SV+1	0.0311728	0.452494	0.241833
RB43L_HUMAN	Putative+Rab+43+like+protein+ENSP00000330714+OS+Homo+sapiens+PE+5+SV+3	-0.292587	0.322946	0.0151796
RENR_HUMAN	Renin+receptor+OS+Homo+sapiens+GN+ATP6AP2+PE+1+SV+2	-0.466782	0.524119	0.0286687
RER1_HUMAN	Protein+RER1+OS+Homo+sapiens+GN+RER1+PE+1+SV+1	-0.247063	0.114962	-0.0660507
RFT1_HUMAN	Protein+RFT1+homolog+OS+Homo+sapiens+GN+RFT1+PE+1+SV+1	-0.675207	-0.313702	-0.494455
RHBD2_HUMAN	Rhomboid+domain+containing+protein+2+OS+Homo+sapiens+GN+RHBDD2+PE+2+SV+2	-0.517213	-0.488588	-0.5029
RHOA_HUMAN	Transforming+protein+RhoA+OS+Homo+sapiens+GN+RHOA+PE+1+SV+1	0.197869	-0.185916	0.00597614
RL40_HUMAN	Ubiquitin+60S+ribosomal+protein+L40+OS+Homo+sapiens+GN+UBA52+PE+1+SV+2	-0.0201814	0.300937	0.140378
RL6_HUMAN	60S+ribosomal+protein+L6+OS+Homo+sapiens+GN+RPL6+PE+1+SV+3	-1.50844	-1.0224	-1.26542
RLA0_HUMAN	60S+acidic+ribosomal+protein+P0+OS+Homo+sapiens+GN+RPLP0+PE+1+SV+1	-0.888474	-0.867848	-0.878161
RLA1_HUMAN	60S+acidic+ribosomal+protein+P1+OS+Homo+sapiens+GN+RPLP1+PE+1+SV+1	-0.993345	-0.918949	-0.956147
ROMO1_HUMAN	Reactive+oxygen+species+modulator+1+OS+Homo+sapiens+GN+ROMO1+PE+1+SV+1	-0.127341	0.0852584	-0.0210412
RPN1_HUMAN	Dolichyl+diphosphooligosaccharide+protein+glycosyltransferase+subunit+1+OS+Homo+sapiens+GN+RPN1+PE	-0.615289	-0.292818	-0.454054
RPN2_HUMAN	Dolichyl+diphosphooligosaccharide+protein+glycosyltransferase+subunit+2+OS+Homo+sapiens+GN+RPN2+PE	-0.710392	-0.278388	-0.49439
RTN4_HUMAN	Reticulon+4+OS+Homo+sapiens+GN+RTN4+PE+1+SV+2	-0.314531	-0.358664	-0.336597
S12A9_HUMAN	Solute+carrier+family+12+member+9+OS+Homo+sapiens+GN+SLC12A9+PE+1+SV+1	0.37717	0.587407	0.482289
S22AI_HUMAN	Solute+carrier+family+22+member+18+OS+Homo+sapiens+GN+SLC22A18+PE+1+SV+3	-0.505536	-0.274536	-0.390036
S27A3_HUMAN	Long+chain+fatty+acid+transport+protein+3+OS+Homo+sapiens+GN+SLC27A3+PE+2+SV+3	0.268191	0.255224	0.261707
S47A2_HUMAN	Multidrug+and+toxin+extrusion+protein+2+OS+Homo+sapiens+GN+SLC47A2+PE+1+SV+1	-0.241112	0.148488	-0.0463119
S4A7_HUMAN	Sodium+bicarbonate+cotransporter+3+OS+Homo+sapiens+GN+SLC4A7+PE+1+SV+2	-0.655086	-1.11787	-0.886477
S61A1_HUMAN	Protein+transport+protein+Sec61+subunit+alpha+isoform+1+OS+Homo+sapiens+GN+SEC61A1+PE+1+SV+2	-0.491979	0.727917	0.117969
SATT_HUMAN	Neutral+amino+acid+transporter+A+OS+Homo+sapiens+GN+SLC1A4+PE+1+SV+1	0.336287	0.18156	0.258924
SC22B_HUMAN	Vesicle+trafficking+protein+SEC22b+OS+Homo+sapiens+GN+SEC22B+PE+1+SV+4	-0.68339	-0.279573	-0.481482
SC61B_HUMAN	Protein+transport+protein+Sec61+subunit+beta+OS+Homo+sapiens+GN+SEC61B+PE+1+SV+2	-0.922842	-0.55236	-0.737601
SCAM1_HUMAN	Secretory+carrier+associated+membrane+protein+1+OS+Homo+sapiens+GN+SCAMP1+PE+1+SV+2	0.24788	0.914513	0.581197
SCAM2_HUMAN	Secretory+carrier+associated+membrane+protein+2+OS+Homo+sapiens+GN+SCAMP2+PE+1+SV+2	-0.178317	0.551975	0.186829
SCAM3_HUMAN	Secretory+carrier+associated+membrane+protein+3+OS+Homo+sapiens+GN+SCAMP3+PE+1+SV+3	0.0494987	0.496681	0.27309
SCAM4_HUMAN	Secretory+carrier+associated+membrane+protein+4+OS+Homo+sapiens+GN+SCAMP4+PE+2+SV+1	-0.140158	0.579018	0.21943
SCFD1_HUMAN	Sec1+family+domain+containing+protein+1+OS+Homo+sapiens+GN+SCFD1+PE+1+SV+4	-0.719708	-0.0830829	-0.401396
SCMC1_HUMAN	Calcium+binding+mitochondrial+carrier+protein+SCaMC+1+OS+Homo+sapiens+GN+SLC25A24+PE+1+SV+2	-0.0690445	0.143342	0.0371485
SCPDH_HUMAN	Probable+saccharopine+dehydrogenase+OS+Homo+sapiens+GN+SCCPDH+PE+1+SV+1	0.105067	-0.0508387	0.0271139
SCRB2_HUMAN	Lysosome+membrane+protein+2+OS+Homo+sapiens+GN+SCARB2+PE+1+SV+2	-0.320183	-0.263527	-0.291855
SEC62_HUMAN	Translocation+protein+SEC62+OS+Homo+sapiens+GN+SEC62+PE+1+SV+1	-0.915753	-0.193774	-0.554764
SERA_HUMAN	D+3+phosphoglycerate+dehydrogenase+OS+Homo+sapiens+GN+PHGDH+PE+1+SV+4	0.333143	0.755033	0.544088
SERC1_HUMAN	Serine+incorporator+1+OS+Homo+sapiens+GN+SERINC1+PE+1+SV+1	0.573445	0.940019	0.756732
SERPH_HUMAN	Serpin+H1+OS+Homo+sapiens+GN+SERPINH1+PE+1+SV+2	0.487551	0.00241799	0.244985
SFXN1_HUMAN	Sideroflexin+1+OS+Homo+sapiens+GN+SFXN1+PE+1+SV+4	0.099335	0.127244	0.11329
SFXN3_HUMAN	Sideroflexin+3+OS+Homo+sapiens+GN+SFXN3+PE+2+SV+2	-0.160109	-0.620713	-0.390411
SNG2_HUMAN	Synaptogyrin+2+OS+Homo+sapiens+GN+SYNGR2+PE+1+SV+1	0.276902	0.669249	0.473076
SNG3_HUMAN	Synaptogyrin+3+OS+Homo+sapiens+GN+SYNGR3+PE+2+SV+2	-0.359891	-0.419403	-0.389647
SORT_HUMAN	Sortilin+OS+Homo+sapiens+GN+SORT1+PE+1+SV+3	-0.197845	0.733598	0.267876
SPCS3_HUMAN	Signal+peptidase+complex+subunit+3+OS+Homo+sapiens+GN+SPCS3+PE+1+SV+1	-0.77601	-0.464993	-0.620501
SPNS1_HUMAN	Protein+spinster+homolog+1+OS+Homo+sapiens+GN+SPNS1+PE+1+SV+1	-0.13137	0.0603138	-0.035528
SQSTM_HUMAN	Sequestosome+1+OS+Homo+sapiens+GN+SQSTM1+PE+1+SV+1	-0.0947348	0.841719	0.373492
SRPR_HUMAN	Signal+recognition+particle+receptor+subunit+alpha+OS+Homo+sapiens+GN+SRPR+PE+1+SV+2	-1.37016	-0.97632	-1.17324
SRPRB_HUMAN	Signal+recognition+particle+receptor+subunit+beta+OS+Homo+sapiens+GN+SRPRB+PE+1+SV+3	0.109082	0.28942	0.199251
SSBP_HUMAN	Single+stranded+DNA+binding+protein+mitochondrial+OS+Homo+sapiens+GN+SSBP1+PE+1+SV+1	0.212519	0.445729	0.329124
SSRA_HUMAN	Translocon+associated+protein+subunit+alpha+OS+Homo+sapiens+GN+SSR1+PE+1+SV+3	-1.10084	-0.764852	-0.932845
SSRD_HUMAN	Translocon+associated+protein+subunit+delta+OS+Homo+sapiens+GN+SSR4+PE+1+SV+1	-0.707616	-0.37139	-0.539503
SSRG_HUMAN	Translocon+associated+protein+subunit+gamma+OS+Homo+sapiens+GN+SSR3+PE+1+SV+1	-0.646642	-0.355528	-0.501085
STML2_HUMAN	Stomatin+like+protein+2+OS+Homo+sapiens+GN+STOML2+PE+1+SV+1	0.203408	-0.32794	-0.0622662
STOM_HUMAN	Erythrocyte+band+7+integral+membrane+protein+OS+Homo+sapiens+GN+STOM+PE+1+SV+3	0.085792	0.276643	0.181218
STT3A_HUMAN	Dolichyl+diphosphooligosaccharide+protein+glycosyltransferase+subunit+STT3A+OS+Homo+sapiens+GN+STT3	-0.603086	-0.128343	-0.365714
STT3B_HUMAN	Dolichyl+diphosphooligosaccharide+protein+glycosyltransferase+subunit+STT3B+OS+Homo+sapiens+GN+STT3	-0.202375	-0.137297	-0.169836
STX12_HUMAN	Syntaxin+12+OS+Homo+sapiens+GN+STX12+PE+1+SV+1	-0.484751	0.0933383	-0.195706
STX16_HUMAN	Syntaxin+16+OS+Homo+sapiens+GN+STX16+PE+1+SV+3	-0.705377	-0.303091	-0.504234
STX4_HUMAN	Syntaxin+4+OS+Homo+sapiens+GN+STX4+PE+1+SV+2	-0.188343	-0.714415	-0.451379
STX5_HUMAN	Syntaxin+5+OS+Homo+sapiens+GN+STX5+PE+1+SV+2	-1.0099	-0.314642	-0.662269
STX6_HUMAN	Syntaxin+6+OS+Homo+sapiens+GN+STX6+PE+1+SV+1	-0.832357	-0.187373	-0.509865
STX7_HUMAN	Syntaxin+7+OS+Homo+sapiens+GN+STX7+PE+1+SV+4	-0.255107	0.456934	0.100914
STX8_HUMAN	Syntaxin+8+OS+Homo+sapiens+GN+STX8+PE+1+SV+2	-0.367319	0.280082	-0.0436186
STXB3_HUMAN	Syntaxin+binding+protein+3+OS+Homo+sapiens+GN+STXBP3+PE+1+SV+2	-0.318186	-0.658636	-0.488411
SURF4_HUMAN	Surfeit+locus+protein+4+OS+Homo+sapiens+GN+SURF4+PE+1+SV+3	-0.47999	-0.284566	-0.382278
SV2A_HUMAN	Synaptic+vesicle+glycoprotein+2A+OS+Homo+sapiens+GN+SV2A+PE+1+SV+1	0.0435528	0.181473	0.112513
SYPL1_HUMAN	Synaptophysin+like+protein+1+OS+Homo+sapiens+GN+SYPL1+PE+1+SV+1	0.090934	0.608776	0.349855
TAP1_HUMAN	Antigen+peptide+transporter+1+OS+Homo+sapiens+GN+TAP1+PE+1+SV+2	-0.754881	-1.02145	-0.888167
TAP2_HUMAN	Antigen+peptide+transporter+2+OS+Homo+sapiens+GN+TAP2+PE+1+SV+1	-0.60171	-0.776796	-0.689253
TBA1A_HUMAN	Tubulin+alpha+1A+chain+OS+Homo+sapiens+GN+TUBA1A+PE+1+SV+1	0.156074	0.340223	0.248148
TBA4A_HUMAN	Tubulin+alpha+4A+chain+OS+Homo+sapiens+GN+TUBA4A+PE+1+SV+1	0.0251743	0.45107	0.238122
TBA8_HUMAN	Tubulin+alpha+8+chain+OS+Homo+sapiens+GN+TUBA8+PE+1+SV+1	0.378523	0.79512	0.586822
TBB1_HUMAN	Tubulin+beta+1+chain+OS+Homo+sapiens+GN+TUBB1+PE+1+SV+1	-0.76909	-1.129	-0.949046
TBB2A_HUMAN	Tubulin+beta+2A+chain+OS+Homo+sapiens+GN+TUBB2A+PE+1+SV+1	-0.218626	-1.14366	-0.681144
TBB3_HUMAN	Tubulin+beta+3+chain+OS+Homo+sapiens+GN+TUBB3+PE+1+SV+2	0.0718588	0.253866	0.162862
TBB4Q_HUMAN	Putative+tubulin+beta+4q+chain+OS+Homo+sapiens+GN+TUBB4Q+PE+5+SV+1	-0.321129	-0.446333	-0.383731
TBB5_HUMAN	Tubulin+beta+chain+OS+Homo+sapiens+GN+TUBB+PE+1+SV+2	0.25961	0.882923	0.571266
TBB6_HUMAN	Tubulin+beta+6+chain+OS+Homo+sapiens+GN+TUBB6+PE+1+SV+1	-0.740833	-0.106236	-0.423535
TBB8_HUMAN	Tubulin+beta+8+chain+OS+Homo+sapiens+GN+TUBB8+PE+1+SV+2	0.0379419	0.0692301	0.053586
TBL2_HUMAN	Transducin+beta+like+protein+2+OS+Homo+sapiens+GN+TBL2+PE+1+SV+1	-0.323554	-1.2862	-0.804878
TECR_HUMAN	Trans+2+3+enoyl+CoA+reductase+OS+Homo+sapiens+GN+TECR+PE+1+SV+1	-0.298098	0.400906	0.0514039
TERA_HUMAN	Transitional+endoplasmic+reticulum+ATPase+OS+Homo+sapiens+GN+VCP+PE+1+SV+4	0.0786741	-0.1056	-0.0134629
TFR1_HUMAN	Transferrin+receptor+protein+1+OS+Homo+sapiens+GN+TFRC+PE+1+SV+2	-0.135656	0.366276	0.11531
TM111_HUMAN	Transmembrane+protein+111+OS+Homo+sapiens+GN+TMEM111+PE+1+SV+3	-0.188836	-0.480653	-0.334744
TM205_HUMAN	Transmembrane+protein+205+OS+Homo+sapiens+GN+TMEM205+PE+1+SV+1	-0.260804	-0.13939	-0.200097
TM55A_HUMAN	Transmembrane+protein+55A+OS+Homo+sapiens+GN+TMEM55A+PE+2+SV+1	0.0815202	0.122309	0.101915
TM55B_HUMAN	Transmembrane+protein+55B+OS+Homo+sapiens+GN+TMEM55B+PE+1+SV+1	0.315207	0.30534	0.310274
TM87A_HUMAN	Transmembrane+protein+87A+OS+Homo+sapiens+GN+TMEM87A+PE+1+SV+3	0.00859114	-0.340923	-0.166166
TM9S1_HUMAN	Transmembrane+9+superfamily+member+1+OS+Homo+sapiens+GN+TM9SF1+PE+2+SV+2	-0.603279	-0.82181	-0.712545
TM9S2_HUMAN	Transmembrane+9+superfamily+member+2+OS+Homo+sapiens+GN+TM9SF2+PE+1+SV+1	-0.551779	0.0634255	-0.244177
TM9S3_HUMAN	Transmembrane+9+superfamily+member+3+OS+Homo+sapiens+GN+TM9SF3+PE+1+SV+2	-0.814674	-0.584594	-0.699634
TM9S4_HUMAN	Transmembrane+9+superfamily+member+4+OS+Homo+sapiens+GN+TM9SF4+PE+1+SV+2	-0.914298	-0.55236	-0.733329
TMCO1_HUMAN	Transmembrane+and+coiled+coil+domain+containing+protein+1+OS+Homo+sapiens+GN+TMCO1+PE+1+SV+1	-0.494809	-0.116337	-0.305573
TMED1_HUMAN	Transmembrane+emp24+domain+containing+protein+1+OS+Homo+sapiens+GN+TMED1+PE+1+SV+1	-0.851185	-0.322132	-0.586658
TMED2_HUMAN	Transmembrane+emp24+domain+containing+protein+2+OS+Homo+sapiens+GN+TMED2+PE+1+SV+1	-0.518969	-0.337375	-0.428172
TMED4_HUMAN	Transmembrane+emp24+domain+containing+protein+4+OS+Homo+sapiens+GN+TMED4+PE+1+SV+1	-0.635592	-0.541596	-0.588594
TMED5_HUMAN	Transmembrane+emp24+domain+containing+protein+5+OS+Homo+sapiens+GN+TMED5+PE+1+SV+1	-0.478441	-0.0664966	-0.272469
TMED7_HUMAN	Transmembrane+emp24+domain+containing+protein+7+OS+Homo+sapiens+GN+TMED7+PE+1+SV+2	-0.592219	-0.51842	-0.555319
TMED9_HUMAN	Transmembrane+emp24+domain+containing+protein+9+OS+Homo+sapiens+GN+TMED9+PE+1+SV+2	-0.877044	-0.313514	-0.595279
TMEDA_HUMAN	Transmembrane+emp24+domain+containing+protein+10+OS+Homo+sapiens+GN+TMED10+PE+1+SV+2	-0.342793	-0.308859	-0.325826
TMM43_HUMAN	Transmembrane+protein+43+OS+Homo+sapiens+GN+TMEM43+PE+1+SV+1	-0.557242	-0.299685	-0.428463
TMM85_HUMAN	Transmembrane+protein+85+OS+Homo+sapiens+GN+TMEM85+PE+1+SV+2	-0.0514569	-0.302944	-0.177201
TMUB1_HUMAN	Transmembrane+and+ubiquitin+like+domain+containing+protein+1+OS+Homo+sapiens+GN+TMUB1+PE+1+SV+1	-0.0813367	0.0393228	-0.021007
TOM40_HUMAN	Mitochondrial+import+receptor+subunit+TOM40+homolog+OS+Homo+sapiens+GN+TOMM40+PE+1+SV+1	-0.0154317	-0.718747	-0.367089
TOM70_HUMAN	Mitochondrial+import+receptor+subunit+TOM70+OS+Homo+sapiens+GN+TOMM70A+PE+1+SV+1	-0.510811	-0.836749	-0.67378
TPBG_HUMAN	Trophoblast+glycoprotein+OS+Homo+sapiens+GN+TPBG+PE+1+SV+1	0.573055	0.786779	0.679917
TPIS_HUMAN	Triosephosphate+isomerase+OS+Homo+sapiens+GN+TPI1+PE+1+SV+2	0.0692482	-0.167889	-0.0493205
TPSN_HUMAN	Tapasin+OS+Homo+sapiens+GN+TAPBP+PE+1+SV+1	-0.966511	-1.1156	-1.04105
TRAM1_HUMAN	Translocating+chain+associated+membrane+protein+1+OS+Homo+sapiens+GN+TRAM1+PE+1+SV+3	-0.518102	-0.174929	-0.346515
TSN6_HUMAN	Tetraspanin+6+OS+Homo+sapiens+GN+TSPAN6+PE+1+SV+1	0.931049	2.50733	1.71919
TTC35_HUMAN	Tetratricopeptide+repeat+protein+35+OS+Homo+sapiens+GN+TTC35+PE+1+SV+1	-0.270257	0.153644	-0.0583067
TXTP_HUMAN	Tricarboxylate+transport+protein+mitochondrial+OS+Homo+sapiens+GN+SLC25A1+PE+1+SV+2	0.0783287	0.343507	0.210918
UBAC2_HUMAN	Ubiquitin+associated+domain+containing+protein+2+OS+Homo+sapiens+GN+UBAC2+PE+2+SV+1	-0.644451	-0.368069	-0.50626
UCRI_HUMAN	Cytochrome+b+c1+complex+subunit+Rieske+mitochondrial+OS+Homo+sapiens+GN+UQCRFS1+PE+1+SV+2	-0.355292	0.700274	0.172491
UFL1_HUMAN	E3+UFM1+protein+ligase+1+OS+Homo+sapiens+GN+KIAA0776+PE+1+SV+2	-0.69737	0.191105	-0.253132
USMG5_HUMAN	Up+regulated+during+skeletal+muscle+growth+protein+5+OS+Homo+sapiens+GN+USMG5+PE+1+SV+1	-0.00626567	-0.237225	-0.121745
VA0D1_HUMAN	V+type+proton+ATPase+subunit+d+1+OS+Homo+sapiens+GN+ATP6V0D1+PE+1+SV+1	-0.0546727	0.013758	-0.0204573
VAMP2_HUMAN	Vesicle+associated+membrane+protein+2+OS+Homo+sapiens+GN+VAMP2+PE+1+SV+3	-0.157916	0.49562	0.168852
VAMP3_HUMAN	Vesicle+associated+membrane+protein+3+OS+Homo+sapiens+GN+VAMP3+PE+1+SV+3	0.0993946	0.218065	0.15873
VAMP7_HUMAN	Vesicle+associated+membrane+protein+7+OS+Homo+sapiens+GN+VAMP7+PE+1+SV+3	0.114828	0.185919	0.150373
VAPA_HUMAN	Vesicle+associated+membrane+protein+associated+protein+A+OS+Homo+sapiens+GN+VAPA+PE+1+SV+3	-0.4582	-0.187722	-0.322961
VAPB_HUMAN	Vesicle+associated+membrane+protein+associated+protein+B+C+OS+Homo+sapiens+GN+VAPB+PE+1+SV+3	-0.661419	-0.229978	-0.445698
VAS1_HUMAN	V+type+proton+ATPase+subunit+S1+OS+Homo+sapiens+GN+ATP6AP1+PE+1+SV+2	-0.363779	0.527807	0.0820142
VDAC1_HUMAN	Voltage+dependent+anion+selective+channel+protein+1+OS+Homo+sapiens+GN+VDAC1+PE+1+SV+2	-0.781469	-1.07193	-0.926698
VDAC2_HUMAN	Voltage+dependent+anion+selective+channel+protein+2+OS+Homo+sapiens+GN+VDAC2+PE+1+SV+2	-0.6626	-0.733363	-0.697982
VDAC3_HUMAN	Voltage+dependent+anion+selective+channel+protein+3+OS+Homo+sapiens+GN+VDAC3+PE+1+SV+1	-0.491915	-0.70801	-0.599963
VKORL_HUMAN	Vitamin+K+epoxide+reductase+complex+subunit+1+like+protein+1+OS+Homo+sapiens+GN+VKORC1L1+PE+1+SV+2	-0.374358	-0.145477	-0.259917
VLDLR_HUMAN	Very+low+density+lipoprotein+receptor+OS+Homo+sapiens+GN+VLDLR+PE+1+SV+1	-0.221108	0.174069	-0.0235194
VPP1_HUMAN	V+type+proton+ATPase+116+kDa+subunit+a+isoform+1+OS+Homo+sapiens+GN+ATP6V0A1+PE+1+SV+3	-0.067543	-0.0250203	-0.0462816
VPS45_HUMAN	Vacuolar+protein+sorting+associated+protein+45+OS+Homo+sapiens+GN+VPS45+PE+1+SV+1	-0.569168	-0.161493	-0.365331
YES_HUMAN	Tyrosine+protein+kinase+Yes+OS+Homo+sapiens+GN+YES1+PE+1+SV+3	0.0461518	0.0555384	0.0508451
ZNT7_HUMAN	Zinc+transporter+7+OS+Homo+sapiens+GN+SLC30A7+PE+1+SV+1	-2.62886	-0.702859	-1.66586
